# Supplementary material
Source: PubMed Central journal article supplement (PMC307592)

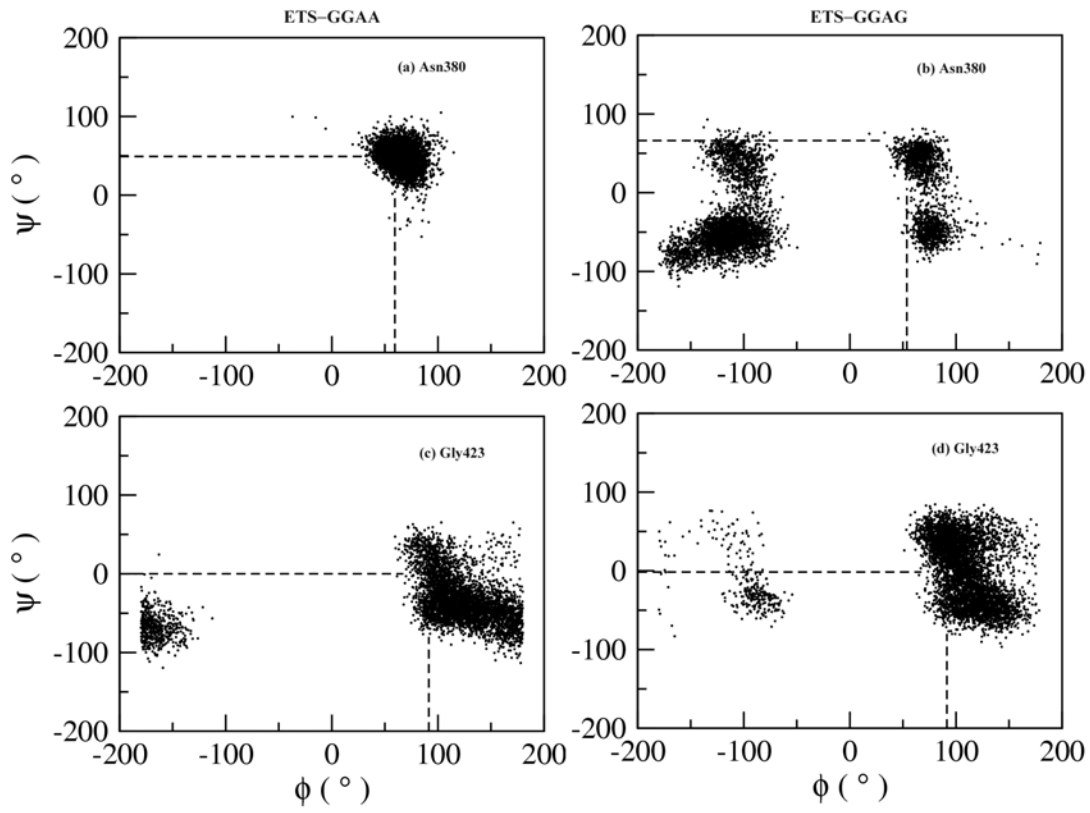

Supplement: pnas_100_26_15475__12.pdf [file pnas_100_26_15475__12.pdf]
